# Supplementary material
Source: Royal Society of Chemistry journal article supplement (doi:10.1039/d6nj00107f)

## Synthesis of Cl@Ti<sub>3</sub>C<sub>2</sub> for Supercapacitor Application and First - Principles Insights into its Enhanced Electrochemical Properties

Sheheera Irfan<sup>a †</sup>, Eisha Naeem<sup>a †</sup>, Yasir A. Haleem<sup>a\*</sup>, Muhammad Usman<sup>a\*</sup>, Muhammad Arshad<sup>b\*</sup>, Abdul Ghafar Wattoo<sup>a</sup>, Abdullah K. Alanazi<sup>c</sup>

<sup>a</sup>Institute of Physics, Khwaja Fareed University of Engineering and Information Technology (KFUEIT), Rahim Yar Khan-64200, Pakistan.

<sup>b</sup> Nano Sciences and Technology Department, National Centre for Physics, Quaid-e-Azam University Campus, Islamabad-45320, Pakistan.

<sup>c</sup> Department of Chemistry, College of Science, Taif University, Taif, Saudi Arabia.

Corresponding Author: Yasir A. Haleem ([hiyasir@mail.ustc.edu.cn](mailto:hiyasir@mail.ustc.edu.cn)/[Yasir.haleem@kfueit.edu.pk](mailto:Yasir.haleem@kfueit.edu.pk))

Muhammad Usman ([zakrian2003@gmail.com](mailto:zakrian2003@gmail.com)), Muhammad Arshad

([arshad\\_pr2002@yahoo.com](mailto:arshad_pr2002@yahoo.com))

Figure SI 1. (a) SEM micrograph of MAX Phase (b) Magnified image of MAX Phase.

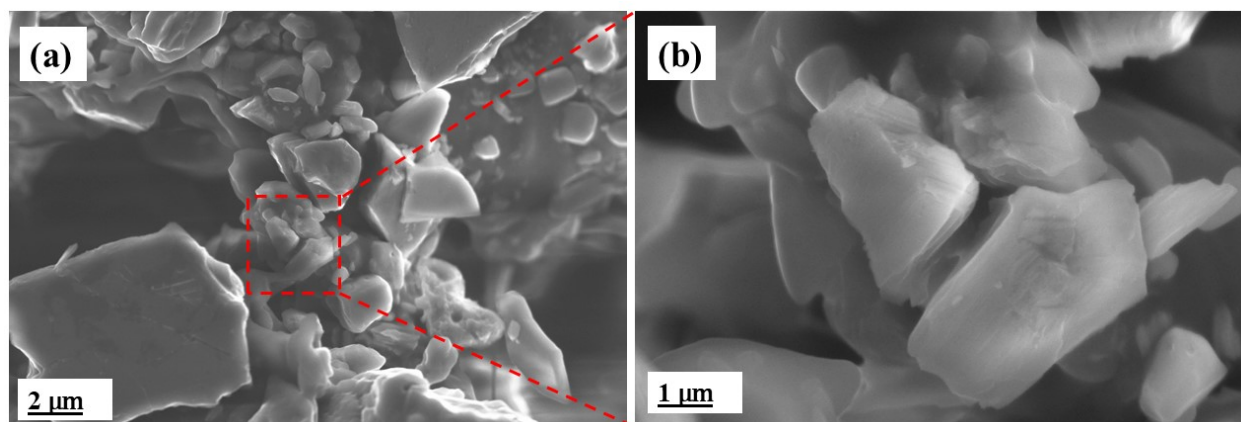

Supplement: d6nj00107f1.pdf [file d6nj00107f1.pdf]
